# Supplementary material
Source: publisher figshare collection journal article supplement (https://sage.figshare.com/ndownloader/files/36009554)
Supplement: Supplementary file 1 [file 36009554]

|  | | | **Males** | | |
| --- | --- | --- | --- | --- | --- |
| **Measurement** | **Interval** | **Statistic** | **Cambodian** | **Chinese** | **Vietnamese** |
| White Blood Cell Count  (x103 cells/µL) | Pretreatment | Mean (95% CI) | 13.21a (12.77-13.65) | 12.12a (11.86-12.38) | 12.60 (12.04-13.24) |
| SD | 3.566 | 3.705 | 3.318 |
| N | 282 | 727 | 122 |
| Median | 12.7 | 11.8 | 12.2 |
| Central 95% | 7.6-21.3 | 6.2-19.9 | 7.9-20.1 |
| Final | Mean (95% CI) | 12.41 (11.98-12.84) | 11.93 (11.67-12.18) | 12.51 (11.87-13.24) |
| SD | 3.549 | 3.515 | 3.694 |
| N | 282 | 727 | 122 |
| Median | 11.8 | 11.5 | 12.0 |
| Central 95% | 7.2-21.4 | 6.1-19.8 | 7.4-21.6 |
| Absolute Neutrophil Count  (x103 cells/µL) | Pretreatment | Mean (95% CI) | 4.389a,b (4.082-4.700) | 4.775a,c (4.584-4.983) | 5.315b,c (4.928-5.773) |
| SD | 2.5581 | 2.7441 | 2.4610 |
| N | 281 | 722 | 122 |
| Median | 3.89 | 4.09 | 4.83 |
| Central 95% | 1.24-11.62 | 1.48-12.43 | 2.07-11.43 |
| Final | Mean (95% CI) | 4.376 (4.053-4.678) | 4.712 (4.523-4.917) | 5.006 (4.510-5.539) |
| SD | 2.6137 | 2.7408 | 2.8071 |
| N | 280 | 722 | 121 |
| Median | 3.68 | 3.98 | 4.41 |
| Central 95% | 1.27-11.04 | 1.50-11.34 | 1.57-11.04 |
| Absolute Lymphocyte Count  (x103 cells/µL) | Pretreatment | Mean (95% CI) | 8.072a,b (7.702-8.456) | 6.660a (6.470-6.856) | 6.634b (6.214-7.069) |
| SD | 3.0494 | 2.6659 | 2.3738 |
| N | 281 | 722 | 122 |
| Median | 7.64 | 6.30 | 6.36 |
| Central 95% | 3.48-15.51 | 2.87-12.96 | 3.15-12.52 |
| Final | Mean (95% CI) | 7.239a (6.954-7.520) | 6.524a (6.342-6.703) | 6.828 (6.367-7.315) |
| SD | 2.4367 | 2.4934 | 2.7494 |
| N | 280 | 722 | 121 |
| Median | 6.92 | 6.13 | 6.25 |
| Central 95% | 3.36-12.75 | 2.73-12.09 | 3.63-13.50 |
| Absolute Monocyte Count  (x103 cells/µL) | Pretreatment | Mean (95% CI) | 0.445a (0.423-0.469) | 0.402a (0.389-0.415) | 0.411 (0.383-0.440) |
| SD | 0.1888 | 0.1727 | 0.1556 |
| N | 281 | 722 | 122 |
| Median | 0.41 | 0.37 | 0.41 |
| Central 95% | 0.18-0.91 | 0.17-0.83 | 0.17-0.72 |
| Final | Mean (95% CI) | 0.426 (0.405-0.446) | 0.419 (0.406-0.432) | 0.415 (0.386-0.441) |
| SD | 0.1731 | 0.1847 | 0.1569 |
| N | 280 | 722 | 121 |
| Median | 0.40 | 0.39 | 0.40 |
| Central 95% | 0.14-0.83 | 0.16-0.86 | 0.19-0.77 |
| Absolute Eosinophil Count  (x103 cells/µL) | Pretreatment | Mean (95% CI) | 0.135a,b (0.118-0.155) | 0.113a (0.104-0.122) | 0.098b (0.084-0.114) |
| SD | 0.1534 | 0.1216 | 0.0824 |
| N | 281 | 722 | 122 |
| Median | 0.09 | 0.07 | 0.07 |
| Central 95% | 0.01-0.48 | 0.01-0.45 | 0.01-0.30 |
| Final | Mean (95% CI) | 0.144 (0.129-0.161) | 0.134 (0.125-0.144) | 0.151 (0.123-0.182) |
| SD | 0.1343 | 0.1291 | 0.1646 |
| N | 280 | 722 | 121 |
| Median | 0.11 | 0.09 | 0.09 |
| Central 95% | 0.01-0.54 | 0.01-0.48 | 0.01-0.55 |
| Absolute Basophil Count  (x103 cells/µL) | Pretreatment | Mean (95% CI) | 0.053 (0.050-0.057) | 0.048 (0.045-0.051) | 0.051 (0.046-0.058) |
| SD | 0.0299 | 0.0410 | 0.0306 |
| N | 281 | 722 | 122 |
| Median | 0.05 | 0.04 | 0.05 |
| Central 95% | 0.02-0.13 | 0.01-0.12 | 0.02-0.15 |
| Final | Mean (95% CI) | 0.040 (0.038-0.043) | 0.042 (0.040-0.043) | 0.047 (0.042-0.052) |
| SD | 0.0217 | 0.0242 | 0.0259 |
| N | 280 | 722 | 121 |
| Median | 0.04 | 0.04 | 0.04 |
| Central 95% | 0.01-0.09 | 0.01-0.10 | 0.01-0.10 |
| Absolute Large Unstained Cell Count  (x103 cells/µL) | Pretreatment | Mean (95% CI) | 0.106a,b (0.098-0.113) | 0.094a (0.090-0.098) | 0.092b (0.083-0.102) |
| SD | 0.0643 | 0.0575 | 0.0534 |
| N | 281 | 722 | 122 |
| Median | 0.09 | 0.08 | 0.08 |
| Central 95% | 0.03-0.26 | 0.03-0.24 | 0.04-0.20 |
| Final | Mean (95% CI) | 0.093 (0.087-0.100) | 0.087 (0.083-0.090) | 0.090 (0.082-0.099) |
| SD | 0.0539 | 0.0519 | 0.0483 |
| N | 280 | 722 | 121 |
| Median | 0.08 | 0.08 | 0.08 |
| Central 95% | 0.03-0.21 | 0.03-0.21 | 0.03-0.23 |
| Red Blood Cell Count  (x106 cells/µL) | Pretreatment | Mean (95% CI) | 5.746 (5.699-5.796) | 5.755 (5.728-5.783) | 5.800 (5.738-5.869) |
| SD | 0.4182 | 0.3988 | 0.3555 |
| N | 282 | 723 | 122 |
| Median | 5.73 | 5.75 | 5.78 |
| Central 95% | 5.03-6.74 | 4.99-6.62 | 5.16-6.44 |
| Final | Mean (95% CI) | 5.618 (5.564-5.673) | 5.666 (5.630-5.701) | 5.555 (5.461-5.646) |
| SD | 0.4657 | 0.4961 | 0.5128 |
| N | 282 | 727 | 122 |
| Median | 5.67 | 5.67 | 5.61 |
| Central 95% | 4.70-6.49 | 4.69-6.67 | 4.55-6.49 |
| Hemoglobin Concentration  (g/dL) | Pretreatment | Mean (95% CI) | 13.52a (13.42-13.62) | 13.39a,c (13.33-13.44) | 13.63c (13.50-13.76) |
| SD | 0.861 | 0.821 | 0.709 |
| N | 282 | 723 | 122 |
| Median | 13.5 | 13.4 | 13.6 |
| Central 95% | 11.9-15.1 | 11.8-15.0 | 12.4-15.0 |
| Final | Mean (95% CI) | 13.25 (13.13-13.37) | 13.26 (13.18-13.33) | 13.09 (12.90-13.28) |
| SD | 0.995 | 1.046 | 1.082 |
| N | 282 | 727 | 122 |
| Median | 13.3 | 13.3 | 13.2 |
| Central 95% | 11.3-15.3 | 11.1-15.0 | 11.0-14.8 |
| Hematocrit  (%) | Pretreatment | Mean (95% CI) | 44.91a,b (44.56-45.26) | 43.97a (43.76-44.17) | 44.01b (43.54-44.47) |
| SD | 3.084 | 2.985 | 2.743 |
| N | 282 | 723 | 122 |
| Median | 44.7 | 44.0 | 43.9 |
| Central 95% | 39.6-50.8 | 38.1-49.8 | 39.4-49.4 |
| Final | Mean (95% CI) | 43.89b (43.51-44.32) | 43.44c (43.19-43.70) | 42.14b,c (41.49-42.83) |
| SD | 3.488 | 3.539 | 3.702 |
| N | 282 | 727 | 122 |
| Median | 43.9 | 43.5 | 42.6 |
| Central 95% | 37.2-50.6 | 36.2-50.0 | 34.6-48.0 |
| Absolute Reticulocyte Count  (x103 cells/µL) | Pretreatment | Mean (95% CI) | 80.01a,b (76.18-83.86) | 73.41a,c (71.06-75.67) | 64.46b,c (60.57-68.92) |
| SD | 31.692 | 32.297 | 23.470 |
| N | 280 | 711 | 119 |
| Median | 76.7 | 65.7 | 61.1 |
| Central 95% | 29.4-152.7 | 31.1-158.2 | 31.0-119.8 |
| Final | Mean (95% CI) | 78.24b (74.52-81.71) | 82.23c (79.42-85.45) | 71.37b,c (66.15-76.87) |
| SD | 30.935 | 40.169 | 30.242 |
| N | 281 | 712 | 121 |
| Median | 71.6 | 72.2 | 63.5 |
| Central 95% | 33.8-152.0 | 31.9-176.9 | 32.2-139.6 |
| Mean Corpuscular Hemoglobin  (pg) | Pretreatment | Mean (95% CI) | 23.58a (23.44-23.71) | 23.30a (23.22-23.39) | 23.53 (23.31-23.74) |
| SD | 1.168 | 1.189 | 1.171 |
| N | 282 | 723 | 122 |
| Median | 23.6 | 23.3 | 23.7 |
| Central 95% | 21.1-25.9 | 20.6-25.5 | 21.2-25.5 |
| Final | Mean (95% CI) | 23.61 (23.47-23.75) | 23.45 (23.35-23.54) | 23.62 (23.42-23.85) |
| SD | 1.201 | 1.213 | 1.245 |
| N | 282 | 727 | 122 |
| Median | 23.5 | 23.5 | 23.6 |
| Central 95% | 21.3-26.0 | 20.8-25.6 | 21.3-26.3 |
| Mean Corpuscular  Hemoglobin Concentration  (g/dL) | Pretreatment | Mean (95% CI) | 30.15a,b (30.00-30.29) | 30.49a,c (30.40-30.58) | 31.01b,c (30.79-31.23) |
| SD | 1.269 | 1.296 | 1.243 |
| N | 282 | 723 | 122 |
| Median | 30.1 | 30.5 | 31.1 |
| Central 95% | 27.8-32.6 | 27.8-32.8 | 28.7-33.5 |
| Final | Mean (95% CI) | 30.22a,b (30.08-30.35) | 30.56a,c (30.46-30.64) | 31.10b,c (30.91-31.31) |
| SD | 1.196 | 1.240 | 1.186 |
| N | 282 | 727 | 122 |
| Median | 30.1 | 30.6 | 31.1 |
| Central 95% | 28.1-32.8 | 28.2-33.0 | 28.7-33.3 |
| Mean Corpuscular Volume  (fL) | Pretreatment | Mean (95% CI) | 78.29a,b (77.83-78.81) | 76.52a (76.22-76.82) | 75.95b (75.34-76.53) |
| SD | 4.129 | 4.103 | 3.470 |
| N | 282 | 723 | 122 |
| Median | 78.5 | 76.4 | 76.3 |
| Central 95% | 71.1-87.4 | 68.3-84.8 | 68.4-82.3 |
| Final | Mean (95% CI) | 78.21a,b (77.74-78.66) | 76.80a,c (76.51-77.08) | 75.98 b,c (75.36-76.62) |
| SD | 3.968 | 3.856 | 3.635 |
| N | 282 | 727 | 122 |
| Median | 78.2 | 76.9 | 75.6 |
| Central 95% | 70.4-85.7 | 68.7-84.1 | 69.7-83.4 |
| Red Blood Cell Distribution Width  (%) | Pretreatment | Mean (95% CI) | 13.08 (12.99-13.17) | 13.03 (12.96-13.10) | 13.01 (12.77-13.22) |
| SD | 0.738 | 0.858 | 0.644 |
| N | 282 | 568 | 28 |
| Median | 13.1 | 13.0 | 13.1 |
| Central 95% | 11.6-14.4 | 11.6-15.0 | 11.3-14.0 |
| Final | Mean (95% CI) | 13.02 (12.94-13.11) | 12.98 (12.91-13.04) | 13.05 (12.81-13.30) |
| SD | 0.751 | 0.787 | 0.718 |
| N | 282 | 593 | 34 |
| Median | 13.0 | 12.9 | 13.1 |
| Central 95% | 11.7-14.6 | 11.6-14.7 | 11.3-14.4 |
| Platelet Count  (x103 cells/µL) | Pretreatment | Mean (95% CI) | 417.6 (407.9-428.1) | 420.3 (413.9-426.5) | 400.4 (386.9-413.7) |
| SD | 87.75 | 90.18 | 82.43 |
| N | 282 | 723 | 122 |
| Median | 420 | 418 | 391 |
| Central 95% | 258-588 | 263-627 | 238-571 |
| Final | Mean (95% CI) | 396.4a (386.9-406.0) | 412.9a (406.1-419.5) | 397.9 (385.0-412.1) |
| SD | 82.45 | 92.43 | 79.10 |
| N | 282 | 727 | 122 |
| Median | 399 | 403 | 382 |
| Central 95% | 250-559 | 255-600 | 283-563 |
| * 95% CI generated via non-parametric bootstrap resampling, n = 1000  aCambodian-Chinese mean pairwise comparison statistically significant  bCambodian-Vietnamese mean pairwise comparison statistically significant  cChinese-Vietnamese mean pairwise comparison statistically significant | | | | | |
